# Supplementary material
Source: PubMed Central journal article supplement (PMC2767220)
Supplement: neo1111_1185SD1.pdf [file neo1111_1185SD1.pdf]

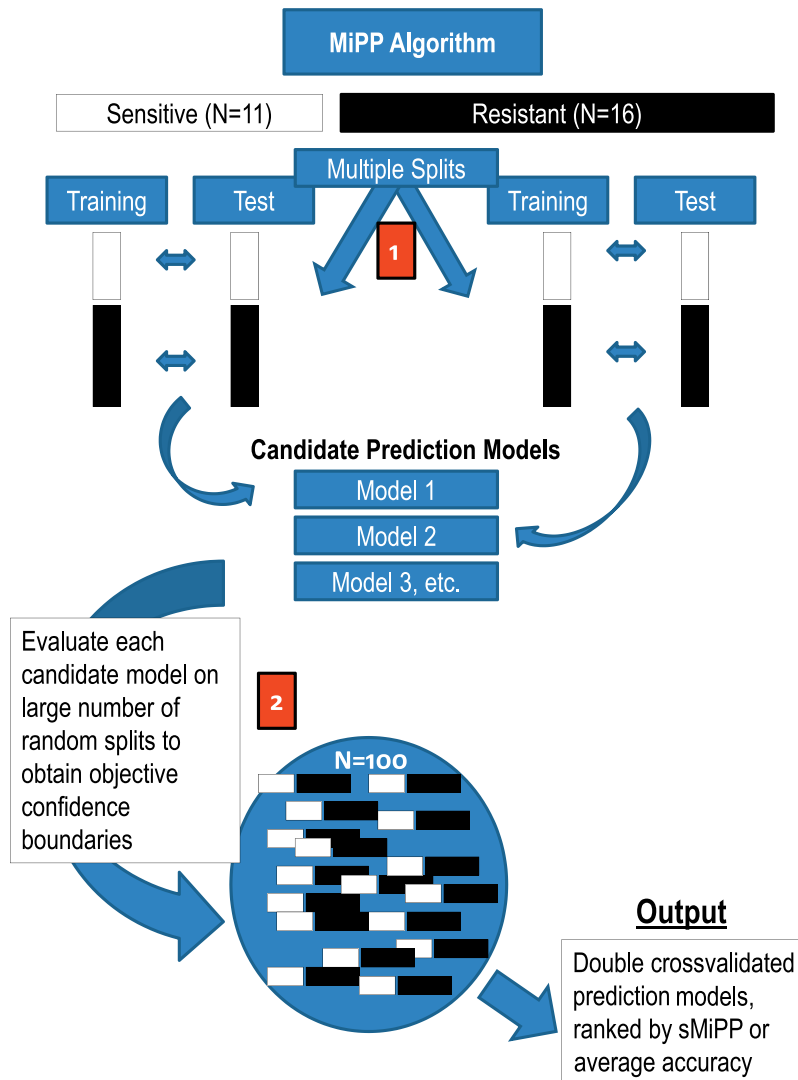

**Figure W1.** The MiPP algorithm. In Step 1, gene expression or phosphoproteomics data for the 11 sensitive and 16 resistant cell lines were split into multiple training and test sets and subjected to the development of prediction models for prediction by linear discriminant analysis. In Step 2, these models are then evaluated against a large number of random splits of the data into training and test sets so as to provide objective confidence intervals for prediction performance and average accuracy. Models may then be ranked by their MiPP score (the sum of the correct classification probabilities of correctly predicted samples minus the sum of incorrect classification probabilities of the incorrectly predicted samples) or the sMiPP (standardized MiPP score ranging from  $-1$  to  $1$ ). This second step thus allows candidate models to be ranked by their objective overall performance, selecting against models overfitting their training data. More detailed information (Soukup et al, *Bioinformatics* 2005;21 Suppl 1:i423–30) and code are available ([www.bioconductor.org](http://www.bioconductor.org)).

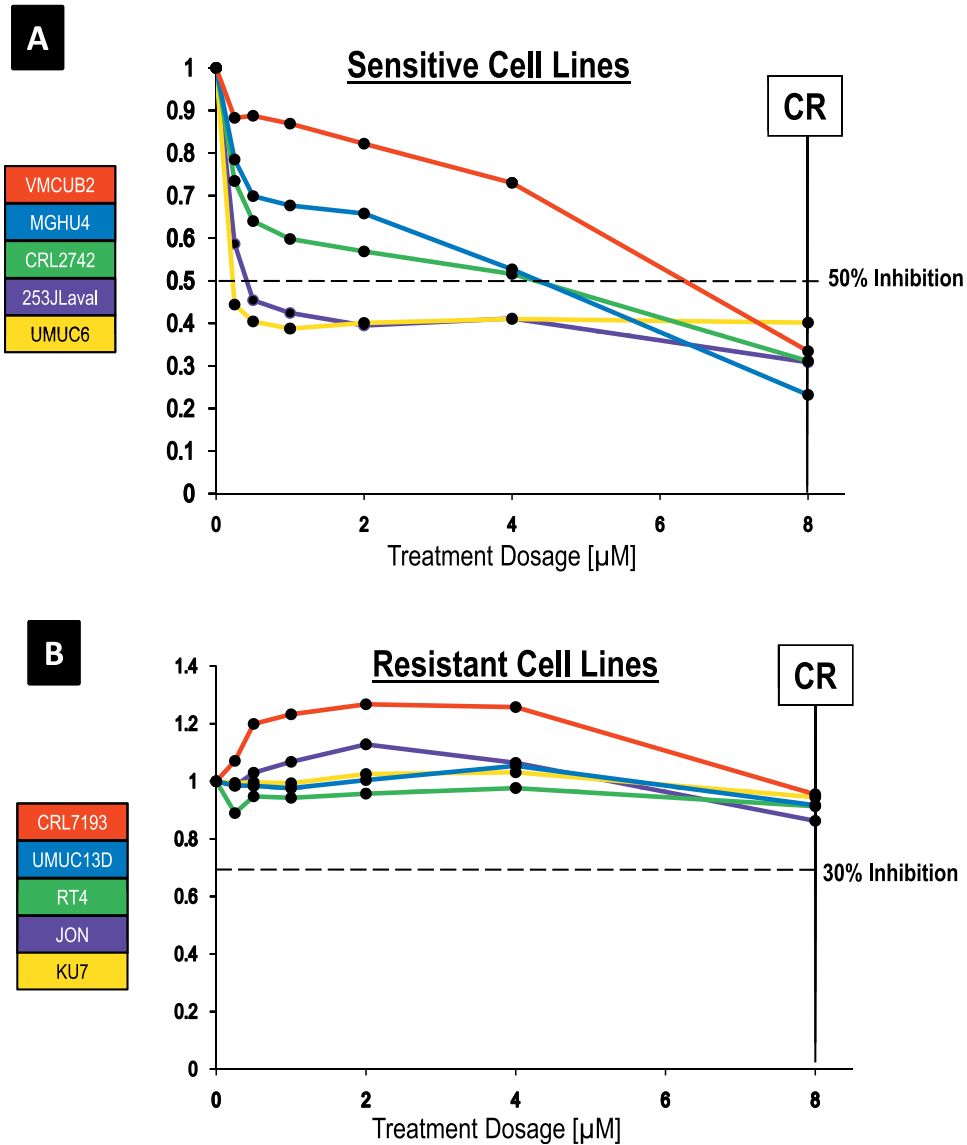

**Figure W2.** Examples of dose-response curves of (A) five sensitive and (B) five resistant bladder cancer cell lines. Sensitivity was defined as  $GI_{50} < 8 \mu\text{M}$ , whereas resistance was defined as  $GI_{30} > 8 \mu\text{M}$ . All cell lines were incubated with lapatinib for 72 hours in RPMI with 10% FBS to ensure internal consistency, with quantitation through the Alamar Blue assay. Cell counts were determined in at least three biologic replicates, normalized by the fraction of control growth for interassay comparison, and means were plotted for the indicated cell lines.

**Table W1.** Thirty-three Probes Associated with Sensitivity\*.

| Probe Set <sup>†</sup> | Name                                                                       | Symbol              | Fold <sup>‡</sup> |
|------------------------|----------------------------------------------------------------------------|---------------------|-------------------|
| 200951_s_at            | Cyclin D2                                                                  | <i>CCND2</i>        | -5.94             |
| 200953_s_at            | Cyclin D2                                                                  | <i>CCND2</i>        | -3.97             |
| 217767_at              | Complement component 3                                                     | <i>C3</i>           | -3.13             |
| 202219_at              | Solute carrier family 6 (neurotransmitter transporter, creatine), member 8 | <i>SLC6A8</i>       | -2.70             |
| 212599_at              | Autism susceptibility candidate 2                                          | <i>AUTS2</i>        | -2.70             |
| 213843_x_at            | Solute carrier family 6 (neurotransmitter transporter, creatine), member 8 | <i>SLC6A8</i>       | -2.70             |
| 213506_at              | Coagulation factor II (thrombin) receptor-like 1                           | <i>F2RL1</i>        | -2.57             |
| 212399_s_at            | Vestigial like 4 ( <i>Drosophila</i> )                                     | <i>VGLL4</i>        | -2.02             |
| 210910_s_at            | POM (POM121 homolog, rat) and ZP3 fusion                                   | <i>POMZP3</i>       | -1.74             |
| 218055_s_at            | WD repeat domain 41                                                        | <i>WDR41</i>        | -1.53             |
| 203066_at              | B-cell RAG associated protein                                              | <i>GALNAC4S-6ST</i> | -1.41             |
| 202653_s_at            | Membrane-associated ring finger (C3HC4) 7                                  | <i>MARCH7</i>       | -1.33             |
| 212150_at              | EFR3 homolog A ( <i>S. cerevisiae</i> )                                    | <i>EFR3A</i>        | -1.07             |
| 206110_at              | —                                                                          | —                   | 1.21              |
| 203765_at              | Grancalcin, EF-hand calcium binding protein                                | <i>GCA</i>          | 1.24              |
| 219603_s_at            | Zinc finger protein 226                                                    | <i>ZNF226</i>       | 1.24              |
| 218538_s_at            | MRS2 magnesium homeostasis factor homolog ( <i>S. cerevisiae</i> )         | <i>MRS2</i>         | 1.25              |
| 214099_s_at            | Phosphodiesterase 4D interacting protein                                   | <i>PDE4DIP</i>      | 1.27              |
| 210102_at              | von Willebrand factor A domain containing 5A                               | <i>VWA5A</i>        | 1.29              |
| 200733_s_at            | Protein tyrosine phosphatase type IVA, member 1                            | <i>PTP4A1</i>       | 1.30              |
| 210054_at              | HAUS augmin-like complex, subunit 3                                        | <i>HAUS3</i>        | 1.39              |
| 219474_at              | Chromosome 3 open reading frame 52                                         | <i>C3orf52</i>      | 1.49              |
| 218000_s_at            | Pleckstrin homology-like domain, family A, member 1                        | <i>PHLDA1</i>       | 1.53              |
| 203865_s_at            | Adenosine deaminase, RNA-specific, B1 (RED1 homolog rat)                   | <i>ADARB1</i>       | 1.56              |
| 219676_at              | Zinc finger and SCAN domain containing 16                                  | <i>ZSCAN16</i>      | 1.65              |
| 207655_s_at            | B-cell linker                                                              | <i>BLNK</i>         | 1.70              |
| 221304_at              | UDP glucuronosyltransferase 1 family, polypeptide A10                      | <i>UGT1A10</i>      | 1.93              |
| 205428_s_at            | Calbindin 2                                                                | <i>CALB2</i>        | 2.06              |
| 204035_at              | Secretogranin II (chromogranin C)                                          | <i>SCG2</i>         | 2.14              |
| 205402_x_at            | Protease, serine, 2 (trypsin 2)                                            | <i>PRSS2</i>        | 2.28              |
| 210105_s_at            | FYN oncogene related to SRC, FGR, YES                                      | <i>FYN</i>          | 2.35              |
| 209942_x_at            | Melanoma antigen family A, 3                                               | <i>MAGEA3</i>       | 2.41              |
| 210467_x_at            | Melanoma antigen family A, 12                                              | <i>MAGEA12</i>      | 5.67              |

\*Using SAM analysis (see Materials and Methods) for differential expression between 11 sensitive cell lines compared with 16 resistant cell lines.

<sup>†</sup>Probeset ID from the Affymetrix HG-U133A oligonucleotide microarray platform.

<sup>‡</sup>Fold change comparing resistant cell lines to sensitive ones.
